# Supplementary material
Source: bioRxiv or medRxiv preprint supplement (https://www.biorxiv.org/highwire/filestream/140878/field_highwire_adjunct_files/1/470393-2.pdf)
Supplement: Supplementary file [file 470393-2.pdf]

**Table 2 – Molecular Beacon BLAST in Xenbase**

Table 2: BLAST of Molecular Beacon sequence against the *Xenopus laevis* genome (version 9.1) using the blastn-DNA query to DNA database tool available at Xenbase (xenbase.org). The absence of RNA expression of matching genome regions was confirmed using RNA-sequencing of axonal transcriptome.

**Column header**

**Comment**

#entry Number of the entry obtained in Xenbase BLAST, tool "blastn-DNA query to DNA database", database "Xenopus Laevis J-strain 9.1 Genome".  
 chr Chromosome  
 hit Sequential number of hits for each chromosome  
 HSP information High-scoring segment pair (BLAST information listed below)  
 chr position Exact chromosome position used as reference for checking match in the axonal seq data  
 Link Direct link with Xenbase genome browser  
 Name Corresponding transcript name of the chromosome location (if reported)  
 Axonal reads in region matching MB Check for absence (no) or presence (yes) of axonal reads in the region matching with MB predicted off-targets

| HSP information |       |     |       |         |              |        |              |            |                           |                                               |                      |                                    |
|-----------------|-------|-----|-------|---------|--------------|--------|--------------|------------|---------------------------|-----------------------------------------------|----------------------|------------------------------------|
| #entry          | chr   | hit | Score | E-value | Identities   | Lenght | Query strand | Hit strand | chr position              | Link                                          | Name                 | Axonal reads in region matching MB |
| 1               | chr4S | 1   | 31.9  | 2       | 17/17 (100%) | 17     | +            | -          | chr4S:84409591-84409607   | JBrowse laevis 9.1: chr4S:84409591-84409607   | pre-miR-181a-1       | Yes                                |
|                 |       | 2   | 30.1  | 7       | 16/16 (100%) | 16     | +            | -          | chr4S:79095178-79095163   |                                               |                      | No                                 |
|                 |       | 3   | 30.1  | 7       | 16/16 (100%) | 16     | +            | +          | chr4S:86435217-86435232   |                                               | intron of ivsn1abp.S | No                                 |
| 2               | chr3L | 1   | 31.9  | 2       | 17/17 (100%) | 17     | +            | +          | chr3L:111609451-111609467 | JBrowse laevis 9.1: chr3L:111609451-111609467 |                      | No                                 |
|                 |       | 2   | 30.1  | 7       | 19/21 (90%)  | 21     | +            | +          | chr3L:89499322-89499342   |                                               |                      | No                                 |
| 3               | chr2S | 1   | 31.9  | 2       | 17/17 (100%) | 17     | +            | -          | chr2S:95381069-95381085   | JBrowse laevis 9.1: chr2S:95381069-95381085   |                      | No                                 |
|                 |       | 2   | 30.1  | 7       | 16/16 (100%) | 16     | +            | -          | chr2S:105454301-105454286 |                                               |                      | No                                 |
| 4               | chr2L | 1   | 31.9  | 2       | 17/17 (100%) | 17     | +            | +          | chr2L:36241555-36241571   | JBrowse laevis 9.1: chr2L:36241555-36241571   |                      | No                                 |
|                 |       | 2   | 30.1  | 7       | 16/16 (100%) | 16     | +            | -          | chr2L:77055047-77055032   |                                               | intron of cask.L     | No                                 |
| 5               | chr8L | 1   | 30.1  | 7       | 16/16 (100%) | 16     | +            | +          | chr8L:83301470-83301485   | JBrowse laevis 9.1: chr8L:83301470-83301485   | intron of numb.L     | No                                 |
| 6               | chr7L | 1   | 30.1  | 7       | 16/16 (100%) | 16     | +            | +          | chr7L:20191991-20192006   | JBrowse laevis 9.1: chr7L:20191991-20192006   | intron of exoc5.L    | No                                 |
|                 |       | 2   | 30.1  | 7       | 19/21 (90%)  | 21     | +            | +          | chr7L:49937355-49937375   |                                               | 5'UTR of slc18a3.L   | No                                 |
| 7               | chr5S | 1   | 30.1  | 7       | 16/16 (100%) | 16     | +            | +          | chr5S:81176673-81176688   | JBrowse laevis 9.1: chr5S:81176673-81176688   | intron of dlgap2.S   | No                                 |
|                 |       | 2   | 30.1  | 7       | 16/16 (100%) | 16     | +            | -          | chr5S:126438407-126438392 |                                               | intron of ftkbp1b.S  | No                                 |
| 8               | chr4L | 1   | 30.1  | 7       | 16/16 (100%) | 16     | +            | +          | chr4L:105418314-105418329 | JBrowse laevis 9.1: chr4L:105418314-105418329 | intron of ivsn1abp.L | No                                 |
| 9               | chr1S | 1   | 30.1  | 7       | 16/16 (100%) | 16     | +            | -          | chr1S:172192521-172192506 | JBrowse laevis 9.1: chr1S:172192506-172192521 |                      | No                                 |
